# Supplementary material for: Commercial arbuscular mycorrhizal fungal inoculant failed to establish in a vineyard despite priority advantage
Source: PeerJ. 2021 Apr 22;9:e11119. doi: 10.7717/peerj.11119 (PMC8071076; doi:10.7717/peerj.11119)
Supplement: Supplemental Information 4 — Results of a grapevine survival survey conducted at the end of the experiment. Columns: id: unique vine identifier treatment: J = juvenile, renamed “established”, N = new, renamed “co-inoculated”, G = greenhouse, renamed “pre-inoculated” inoc: 0 = control, 1 = inoculated status: 0 = dead or replaced, 1 = alive. [file peerj-09-11119-s004.csv]

id	treatment	status	inoc
N34	N	1	1
G31	G	0
N35	N	1	0
G91	G	1
N41	N	1	0
G40	G	1	0
N43	N	1	0
G41	G	1	0
N44	N	1	1
N47	N	1	1
J49	J	1	1
N49	N	1	1
N51	N	1	0
G52	G	1	0
G53	G	1	1
G55	G	0	0
G56	G	1	1
G60	G	1	1
G61	G	1	0
G62	G	1	0
G65	G	1	1
G63	G	0	0
G71	G	1	0
G73	G	1	1
G76	G	1	1
G81	G	0	1
G80	G	0	0
G97	G	1	1
N95	N	1	1
G98	G	0	1
G99	G	1	1
N92	N	1	1
N33	N	0
J50	J	1	0
J48	J	1	1
J47	J	1	1
J46	J	0	1
J45	J	0	1
G38	G	1
G39	G	1	1
N45	N	1	1
N46	N	1	0
G50	G	1	0
N48	N	1	0
N58	N	1	1
N59	N	1	1
J66	J	1
J90	J	1
G68	G	1	0
J70	J	0
N79	N	1	0
G69	G	1	1
N77	N	1	1
N78	N	0	0
N79.2	N	1
N82	N	0	0
N83	N	1	0
N85	N	0	1
N87	N	1	1
N89	N	1	0
G84	G	1	1
G88	G	1	1
G93	G	1	0
N94	N	1	1
N91	N	1	0
N01	N	1	1
O55	O	1	1
O57	O	1	1
O58	O	1	0
O53	O	1	1
O52	O	1	0
G02	G	1
O43	O	1	1
O44	O	1	0
O45	O	1	1
O46	O	1	0
O41	O	1	0
O40	O	1	0
O39	O	1	1
J16	J	1	1
J17	J	0	0
O31	O	1	1
O32	O	1	0
J12	J	1	1
O33	O	1	1
O34	O	1	0
J19	J	0	1
J20	J	1	1
J21	J	1	0
J22	J	1	1
O30	O	1	0
N03	N	1	0
J23	J	1	1
O21	O	1	1
O22	O	1	0
J27	J	1	0
N04	N	0	1
O23	O	1	1
J28	J	1	1
J34	J	1	1
J35	J	1	1
J36	J	0	1
O20	O	1	0
O19	O	1	1
O11	O	1	1
O12	O	1	0
G05	G	1	0
O13	O	1	1
J38	J	0	0
J39	J	0	0
J40	J	0	0
O14	O	1	0
J41	J	1	0
J42	J	1	1
O10	O	1	0
J43	J	1	0
O09	O	1	1
O01	O	1	1
O02	O	1	0
O03	O	1	1
O04	O	1	0
N07	N	1	1
N09	N	0	0
G08	G	0	1
G11	G	1	0
N13	N	1	0
G14	G	0	1
G15	G	0	0
G17	G	1	0
N21	N	1	1
G20	G	1	1
O59	O	1	1
O60	O	1	0
O51	O	1	1
J03	J	0	0
O49	O	1	1
O47	O	1	1
O48	O	1	0
J07	J	1	1
O38	O	1	1
J09	J	1	0
J10	J	1	0
J13	J	0	0
O35	O	1	1
O36	O	1	0
O28	O	1	0
J25	J	1	1
J26	J	1	0
O27	O	1	1
O26	O	1	0
O25	O	1	1
J24	J	1	0
J30	J	1	0
O18	O	1	0
J37	J	1	1
O17	O	1	1
O16	O	1	0
O15	O	1	1
O08	O	1	0
J44	J	1
O07	O	1	1
O06	O	1	0
O05	O	1	1
J45	J	0	1
N25	N	0	0
N28	N	0	0
N29	N	0	1
